# Supplementary material for: H2/D2 separation in gas chromatography through a MOF-on-MOF strategy using γ-AlOOH@Al(OH)(1,4-NDC)@ZIF-67 as the stationary phase via additive effects of chemical affinity quantum sieving and kinetic sieving
Source: Royal Society of Chemistry journal article supplement (doi:10.1039/d2dt03635e), 2022-12-06
Supplement: d2dt03635e1.pdf [file d2dt03635e1.pdf]

**H<sub>2</sub>/D<sub>2</sub> separation in gas chromatography through a MOF-on-MOF strategy using  $\gamma$ -AlOOH@Al(OH)(1,4-NDC)@ZIF-67 as stationary phase via additive effects of chemical affinity quantum sieving and kinetic sieving**

Enming Ping, Lingyun Kong, Mengyao Liu, Yunshan Zhou\*, Lijuan Zhang\*, Nan Chen

State Key Laboratory of Chemical Resource Engineering, College of Chemistry, Beijing University of Chemical Technology, Beijing 100029, P. R. China

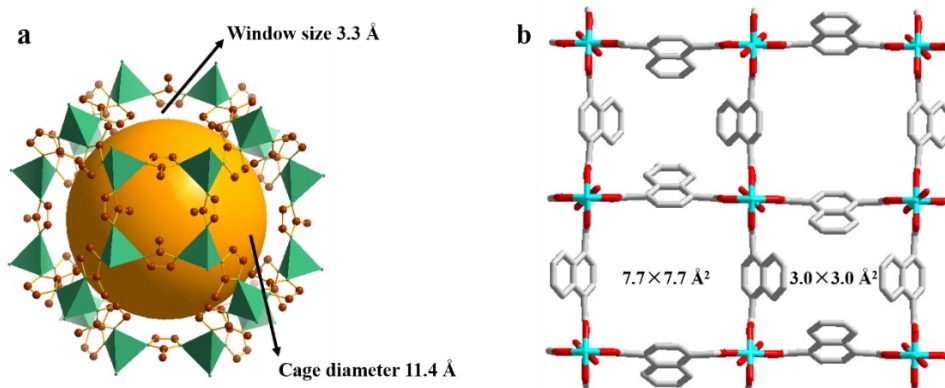

**Fig. S1** The pore structure of ZIF-67 (the window size of 3.4 Å, the cage diameter of 11.4 Å) (a) and Al(OH)(1,4-NDC) (two types of pores, 7.7 × 7.7 Å<sup>2</sup> and 3.0 × 3.0 Å<sup>2</sup>) (b).

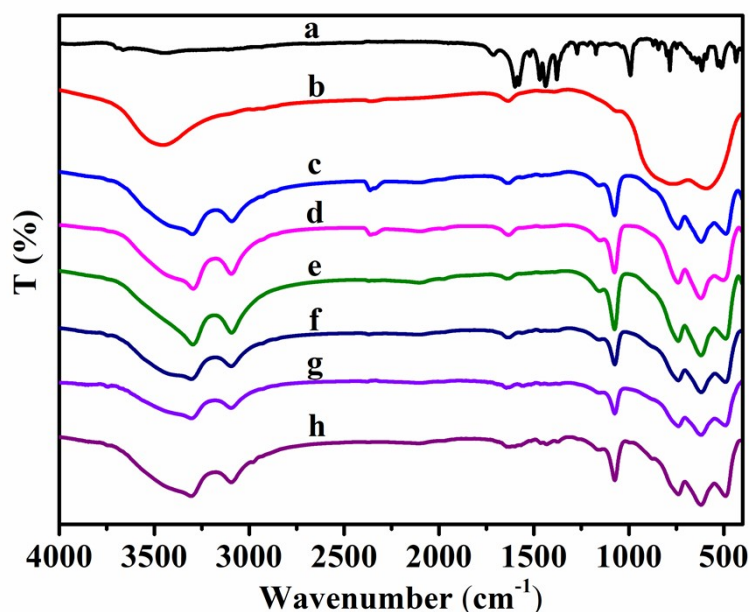

**Fig. S2** IR spectra of Al(OH)(1,4-NDC) (line a),  $\gamma$ -Al<sub>2</sub>O<sub>3</sub> (line b),  $\gamma$ -AlOOH (line c),  $\gamma$ -AlOOH@1.02%-Al(OH)(1,4-NDC) (line d),  $\gamma$ -AlOOH@1.12%-Al(OH)(1,4-NDC) (line e),  $\gamma$ -AlOOH@2.61%-Al(OH)(1,4-NDC) (line f),  $\gamma$ -AlOOH@4.35%-Al(OH)(1,4-NDC) (line g),  $\gamma$ -AlOOH@6.63%-Al(OH)(1,4-NDC) (line h).

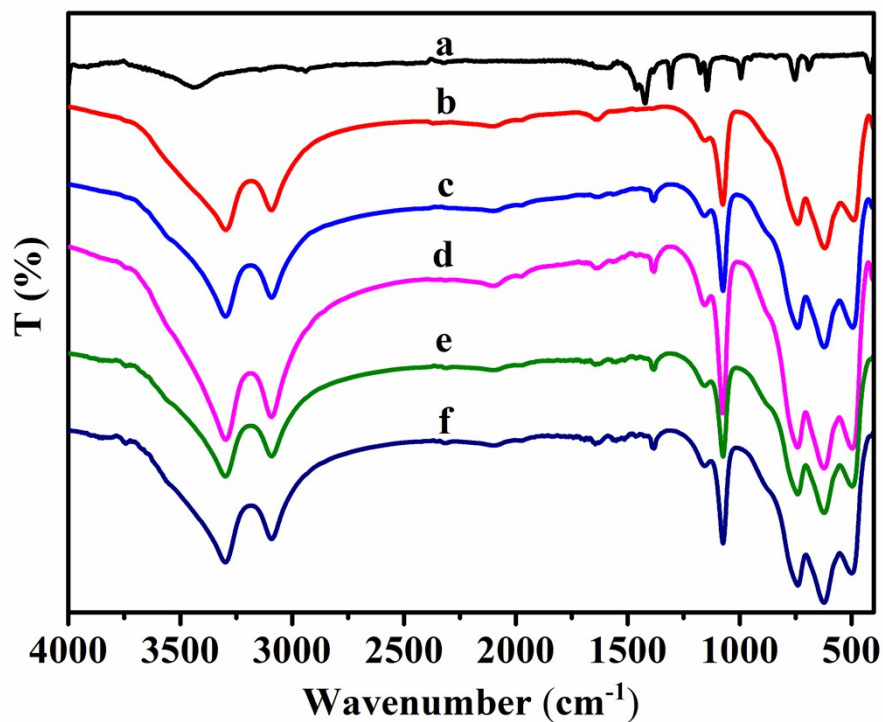

**Fig. S3** IR spectra of ZIF-67 (line a);  $\gamma$ -AlOOH@1.12%-Al(OH)(1,4-NDC) (line b);  $\gamma$ -AlOOH @1.12%-Al(OH)(1,4-NDC)@1-ZIF-67 (line c);  $\gamma$ -AlOOH @1.12%-Al(OH)(1,4-NDC)@2-ZIF-67 (line d);  $\gamma$ -AlOOH @1.12%-Al(OH)(1,4-NDC)@3-ZIF-67 (line e);  $\gamma$ -AlOOH@1.12%-Al(OH)(1,4-NDC)@4-ZIF-67 (line f).

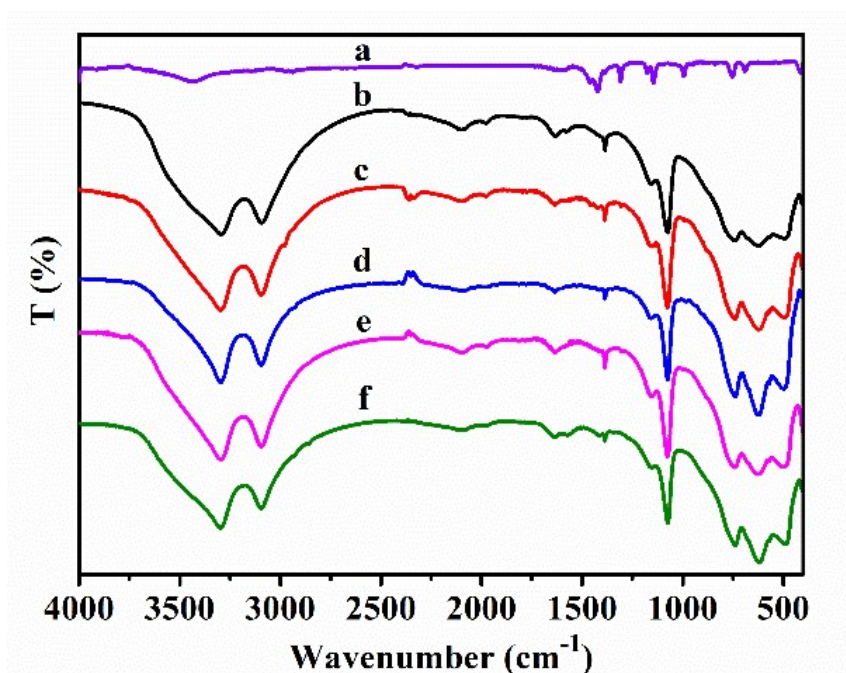

**Fig. S4** IR spectra of ZIF-67 (line a);  $\gamma$ -AlOOH@2-ZIF-67 (line b);  $\gamma$ -AlOOH@4-ZIF-67 (line c);  $\gamma$ -AlOOH@6-ZIF-67 (line d);  $\gamma$ -AlOOH@8-ZIF-67 (line e);  $\gamma$ -AlOOH (line f).

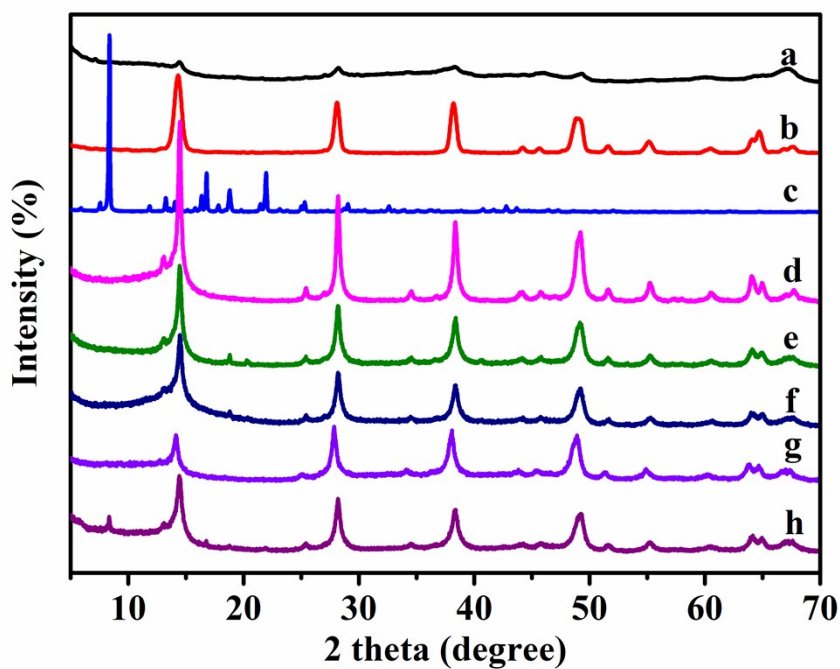

**Fig. S5** P-XRD patterns of  $\gamma$ - $\text{Al}_2\text{O}_3$  (line a),  $\gamma$ - $\text{AlOOH}$  (line b),  $\text{Al}(\text{OH})(1,4\text{-NDC})$  (line c),  $\gamma$ - $\text{AlOOH}@1.02\%-\text{Al}(\text{OH})(1,4\text{-NDC})$  (line d),  $\gamma$ - $\text{AlOOH}@1.12\%-\text{Al}(\text{OH})(1,4\text{-NDC})$  (line e),  $\gamma$ - $\text{AlOOH}@2.61\%-\text{Al}(\text{OH})(1,4\text{-NDC})$  (line f),  $\gamma$ - $\text{AlOOH}@4.35\%-\text{Al}(\text{OH})(1,4\text{-NDC})$  (line g),  $\gamma$ - $\text{AlOOH}@6.63\%-\text{Al}(\text{OH})(1,4\text{-NDC})$  (line h).

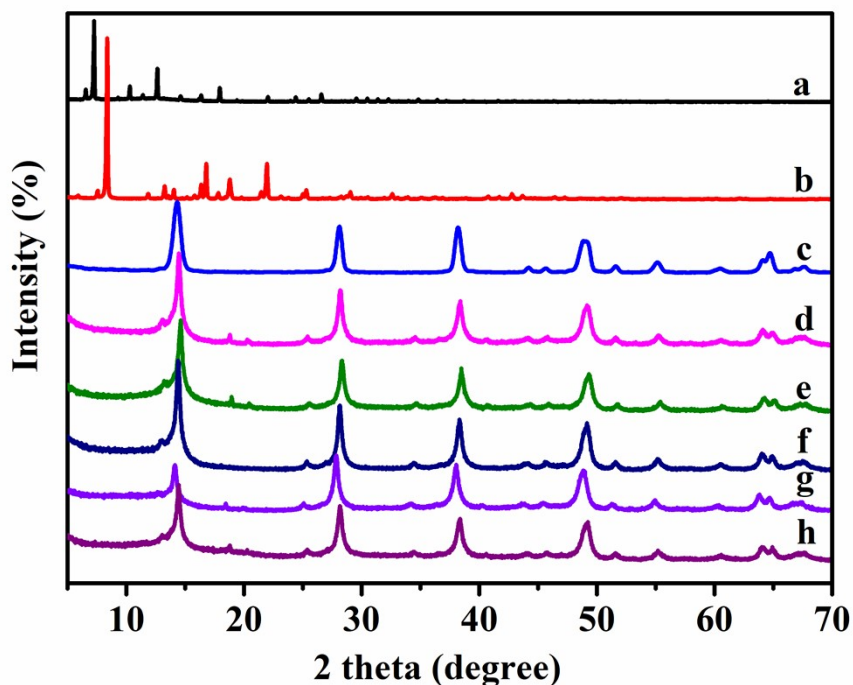

**Fig. S6** P-XRD patterns of ZIF-67 (line a),  $\text{Al}(\text{OH})(1,4\text{-NDC})$  (line b),  $\gamma$ - $\text{AlOOH}$  (line c),  $\gamma$ - $\text{AlOOH}@1.12\%-\text{Al}(\text{OH})(1,4\text{-NDC})$  (line d),  $\gamma$ - $\text{AlOOH}@1.12\%-\text{Al}(\text{OH})(1,4\text{-NDC})@1\text{-ZIF-67}$

(line e),  $\gamma$ -AlOOH@1.12%-Al(OH)(1,4-NDC)@2-ZIF-67 (line f),  $\gamma$ -AlOOH@1.12%-Al(OH)(1,4-NDC)@3-ZIF-67 (line g),  $\gamma$ -AlOOH@1.12%-Al(OH)(1,4-NDC)@4-ZIF-67 (line h).

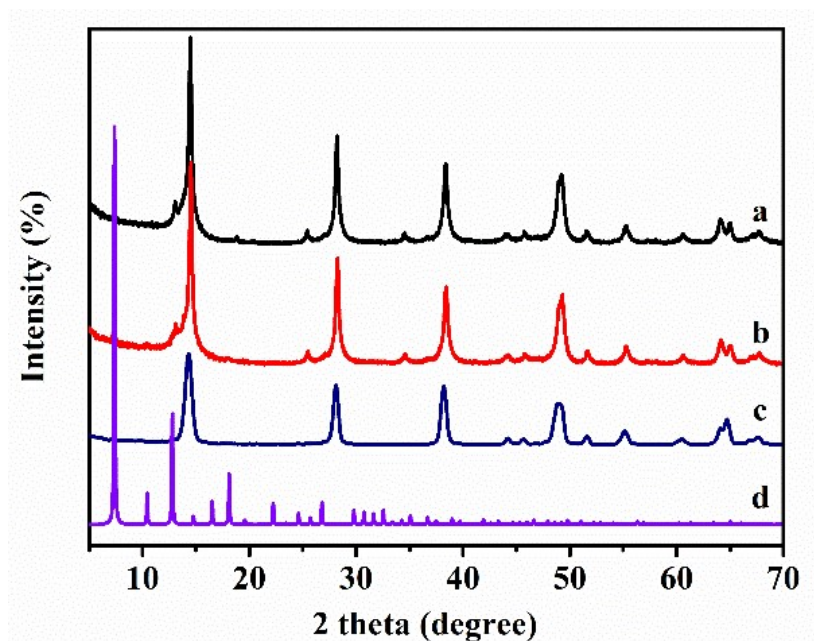

**Fig. S7** XRD patterns of  $\gamma$ -AlOOH@2-ZIF-67 (line a);  $\gamma$ -AlOOH@4-ZIF-67 (line b);  $\gamma$ -AlOOH (line c); ZIF-67 (line d).

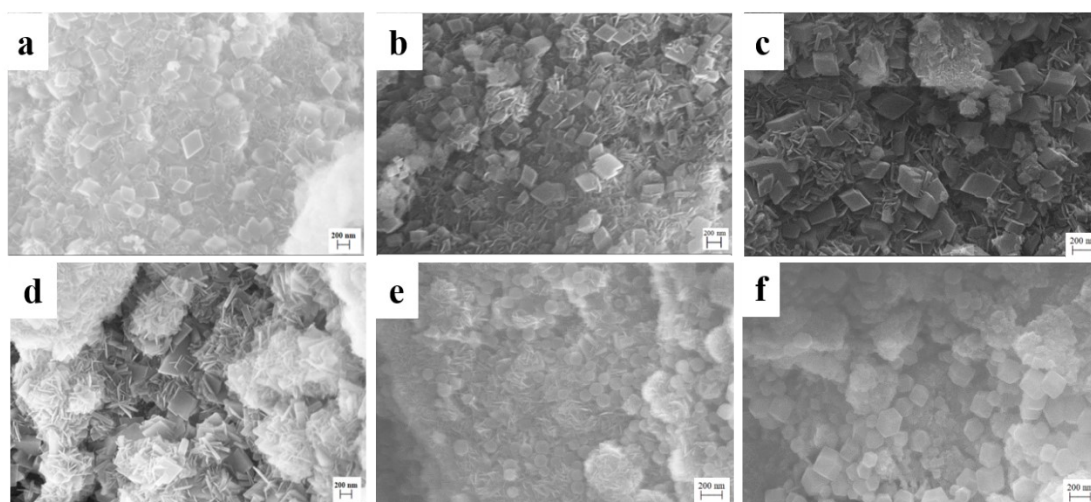

**Fig. S8** SEM patterns of  $\gamma$ -AlOOH(a),  $\gamma$ -AlOOH@1.02%-Al(OH)(1,4-NDC) (b),  $\gamma$ -AlOOH@1.12%-Al(OH)(1,4-NDC) (c),  $\gamma$ -AlOOH@2.61%-Al(OH)(1,4-NDC) (d),  $\gamma$ -AlOOH@1.12%-Al(OH)(1,4-NDC)@2-ZIF-67 (e),  $\gamma$ -AlOOH@1.12%-Al(OH)(1,4-NDC)@4-ZIF-67 (f).

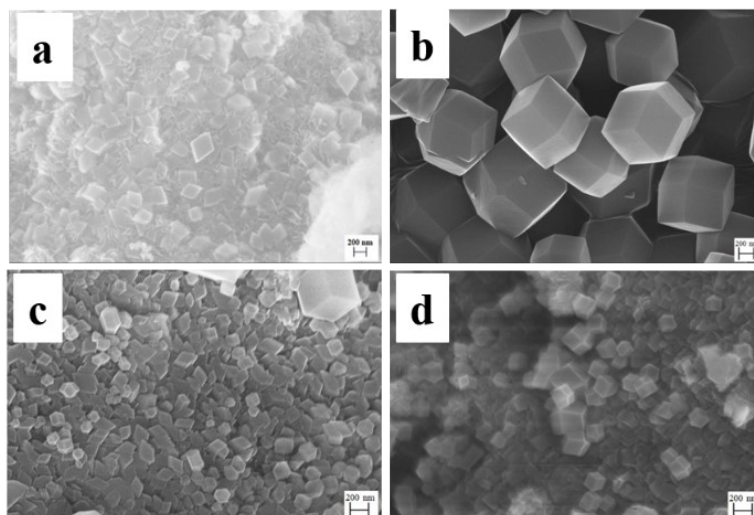

**Fig. S9** SEM patterns of  $\gamma$ -AlOOH (a), ZIF-67(b),  $\gamma$ -AlOOH@2-ZIF-67 (c),  $\gamma$ -AlOOH@4-ZIF-67 (d).

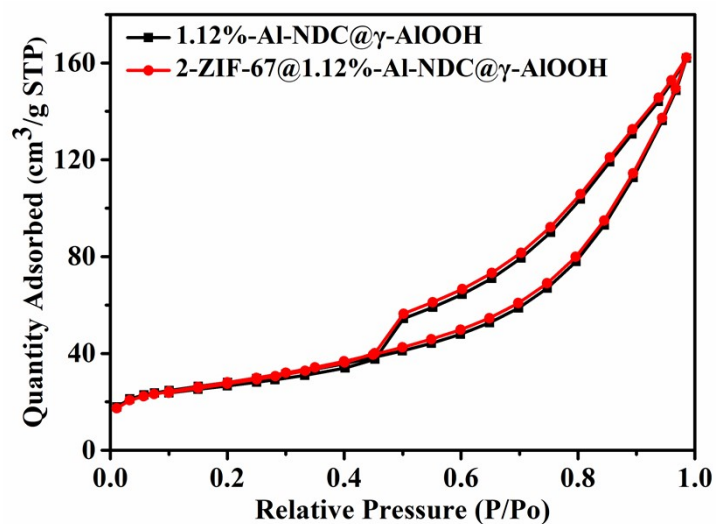

**Fig. S10** The  $N_2$  Adsorption-desorption isotherms of  $\gamma$ -AlOOH@1.12%-Al(OH)(1,4-NDC) and  $\gamma$ -AlOOH@1.12%-Al(OH)(1,4-NDC)@2-ZIF-67.

**Table S1** BET characterization data for chromatographic stationary phase materials.

| Chromatographic stationary phase               | Specific surface area (m <sup>2</sup> /g) | Pore volume (cm <sup>3</sup> /g) | Average aperture (nm) |
|------------------------------------------------|-------------------------------------------|----------------------------------|-----------------------|
| $\gamma$ -Al <sub>2</sub> O <sub>3</sub>       | 205.2                                     | 0.484                            | 7.64                  |
| $\gamma$ -AlOOH                                | 294.30                                    | 0.69                             | 8.49                  |
| $\gamma$ -AlOOH@1.12%-Al(OH)(1,4-NDC)          | 97.75                                     | 0.2435                           | 10.86                 |
| $\gamma$ -AlOOH@1.12%-Al(OH)(1,4-NDC)@2-ZIF-67 | 99.39                                     | 0.2471                           | 10.12                 |
| $\gamma$ -AlOOH@2-ZIF-67                       | 78.37                                     | 0.2175                           | 11.59                 |

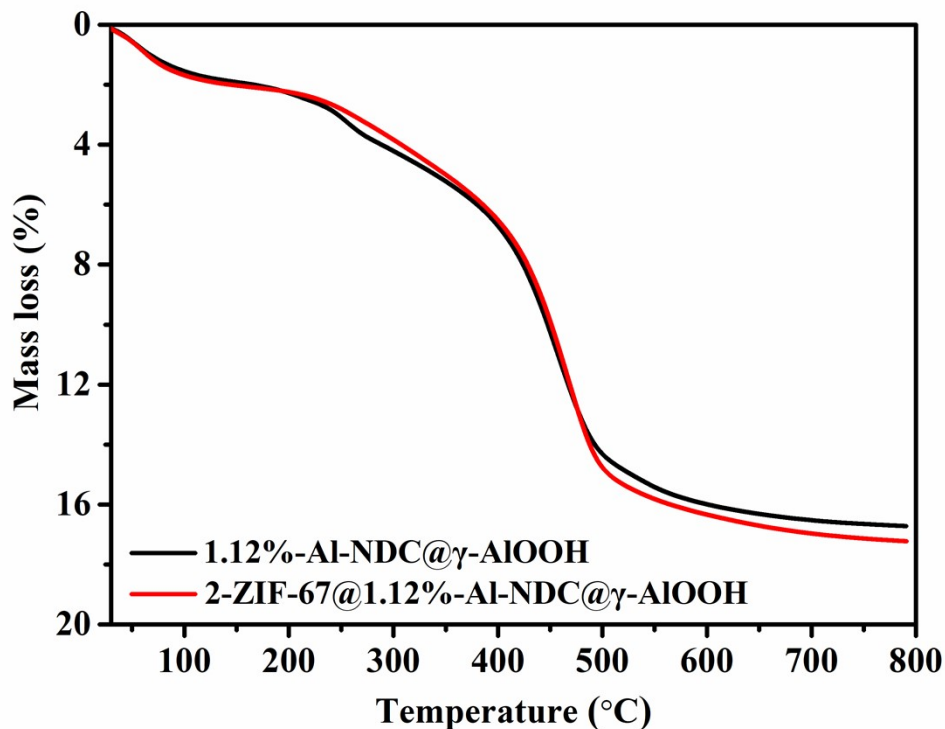

**Fig. S11** Thermogravimetric curves of composites  $\gamma$ -AlOOH@1.12%-Al(OH)(1,4-NDC) and  $\gamma$ -AlOOH@1.12%-Al(OH)(1,4-NDC)@2-ZIF-67.

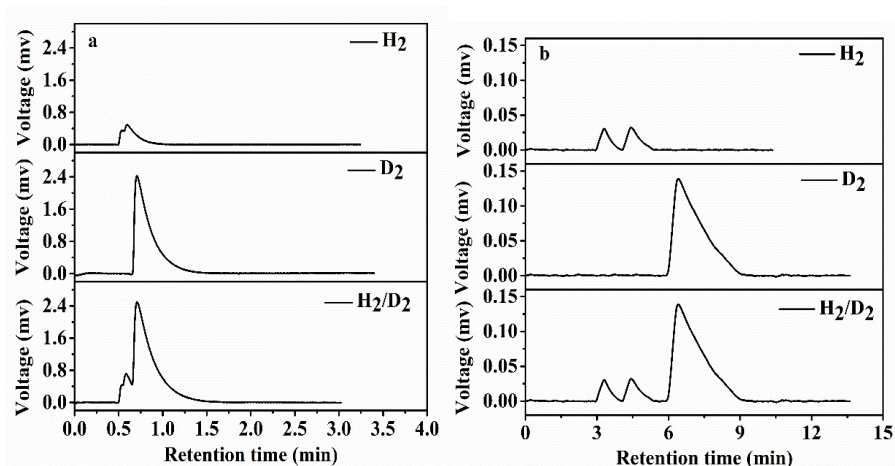

**Fig. S12** The chromatograms of  $H_2$ ,  $D_2$  and the  $H_2/D_2$  gas mixture over  $\gamma$ -AlOOH (a) and  $\gamma$ -AlOOH@1.12%-Al(OH)(1,4-NDC) (b) as a stationary phase, respectively. (Chromatographic conditions: Column temperature, 77 K; Injection volume: 125  $\mu$ L for  $H_2$ , 125  $\mu$ L for  $D_2$  and 250  $\mu$ L  $H_2/D_2$  gas mixture ( $V_{H_2}:V_{D_2} = 1:1$ ); Carrier gas He flow rate, 90 mL/min).

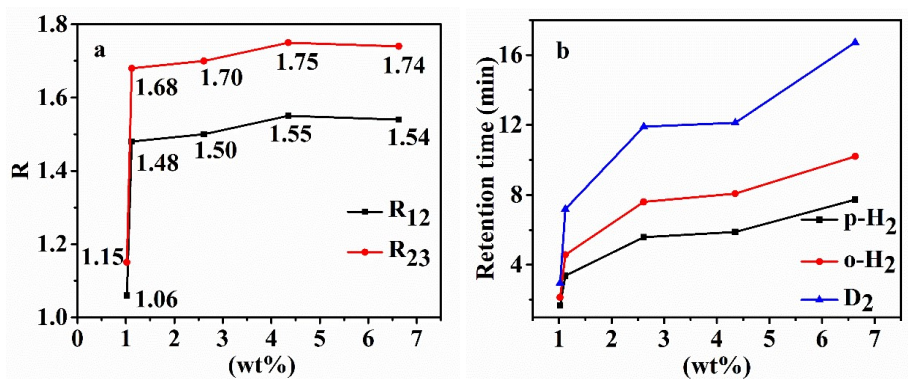

**Fig. S13** The relationship between the content of Al(OH)(1,4-NDC) in  $\gamma$ -AlOOH@m-Al(OH)(1,4-NDC) ( $m = 1.02\%$ ,  $1.12\%$ ,  $2.61\%$ ,  $4.35\%$ ,  $6.63\%$ ) and the resolution (a), and the retention time (b) to separate H<sub>2</sub>/D<sub>2</sub>. Chromatographic conditions: column temperature, 77 K; injection volume of H<sub>2</sub>/D<sub>2</sub> mixture, 50  $\mu$ L H<sub>2</sub>/D<sub>2</sub> gas mixture(V:V= 1:1); carrier gas He flow rate, 30 ml·min<sup>-1</sup>.

The theoretical plate number and the corresponding height equivalent to a theoretical plate (HETP) calculated using the formula (S1) and (S2),

$$\text{theoretical plate number} = 5.54(t_R/w_{1/2})^2 \quad (\text{S1})$$

$$\text{HETP} = L/\text{theoretical plate number} \quad (\text{S2})$$

where  $L$  is the column length,  $t_R$  is the retention time and  $W_{1/2}$  is the half-width.

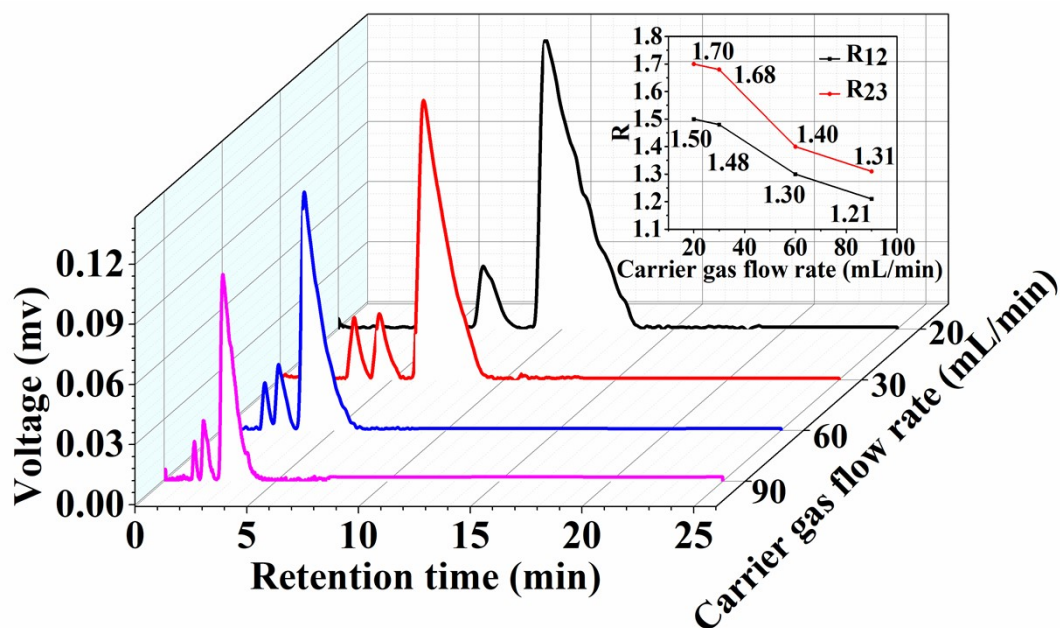

**Fig. S14** Separation chromatogram of H<sub>2</sub>/D<sub>2</sub> with  $\gamma$ -AlOOH@1.12%-Al(OH)(1,4-NDC) as chromatographic stationary phase under different carrier gas flow rates (inset: relationship between carrier gas flow rate and resolution). Chromatographic separation conditions: Column temperature, 77 K; Injection volume, 50  $\mu$ L; Carrier gas flow rate of He, 20, 30, 60, 90 mL·min<sup>-1</sup>.

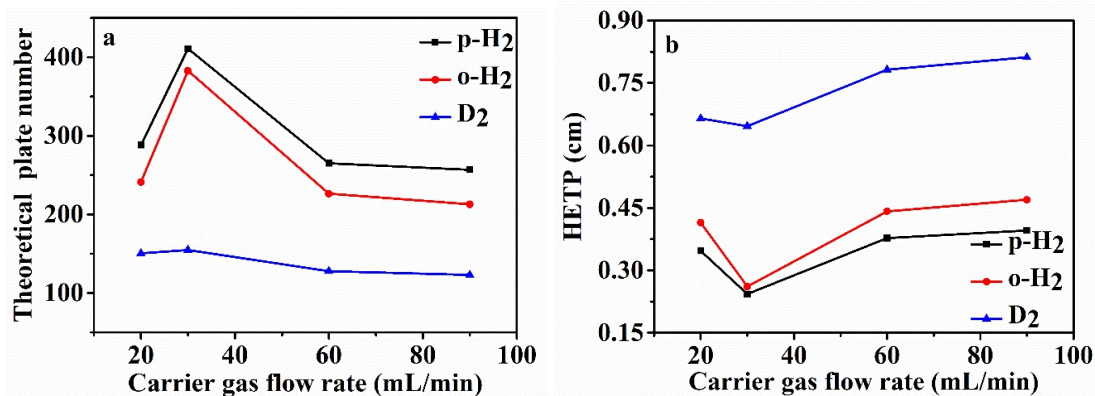

**Fig. S15** The relationship between carrier gas flow rate and the number of theoretical plate (a) or the HETP (b) with  $\gamma$ -AlOOH@1.12%-Al(OH)(1,4-NDC). Chromatographic separation conditions: Column temperature, 77 K; Injection volume, 50  $\mu$ L; Carrier gas flow rate of He, 20, 30, 60, 90 mL $\cdot$ min<sup>-1</sup>.

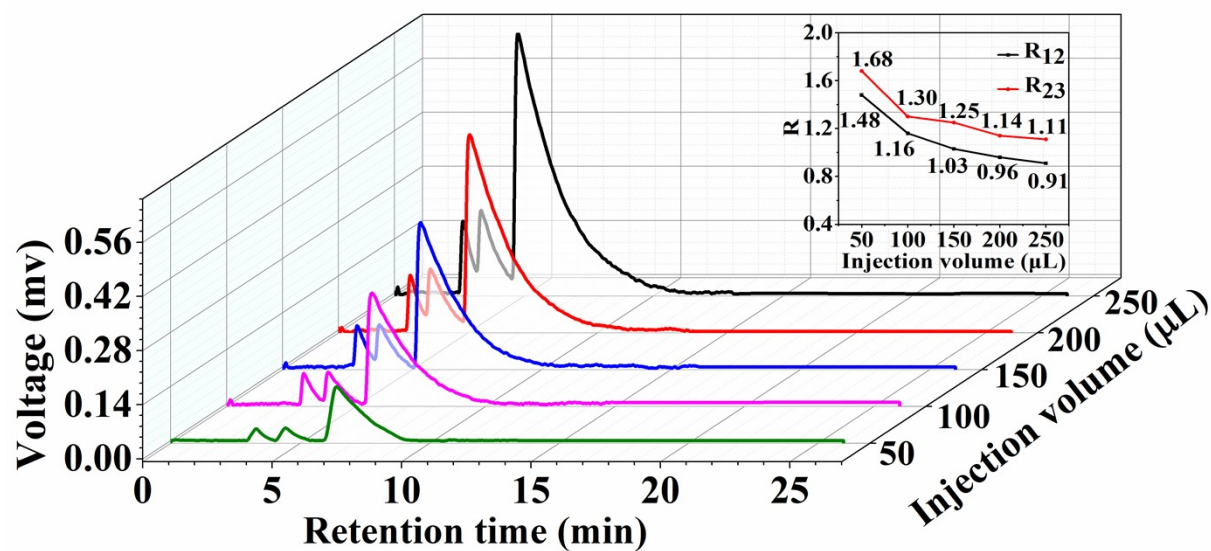

**Fig. S16** Separation Chromatography of H<sub>2</sub>/D<sub>2</sub> with different injection quantities using  $\gamma$ -AlOOH@1.12%-Al(OH)(1,4-NDC) as stationary phase (inset: the relationship between resolution and injection volume). (Chromatographic separation conditions: Column temperature, 77 K; Injection volume, 50, 100, 150, 200, 250  $\mu$ L; Carrier gas He flow rate, 30 mL $\cdot$ min<sup>-1</sup>).



**Table S2** Parameters of  $\gamma$ -AlOOH@1.12%-Al(OH)(1,4-NDC)@n-ZIF-67 (n = 0, 1, 2, 3, 4), H<sub>2</sub> and D<sub>2</sub> for different ZIF-67 loading cycles at 77 K with gas flow rate 30 mL·min<sup>-1</sup> and H<sub>2</sub>/D<sub>2</sub> mixture injection volume 50  $\mu$ L (V<sub>H<sub>2</sub></sub>:V<sub>D<sub>2</sub></sub> = 1:1).

| Materials                                      | Load number of ZIF-67 (n) | Retention time (t <sub>R</sub> , min) |                |      | R         | Separation time (min) |
|------------------------------------------------|---------------------------|---------------------------------------|----------------|------|-----------|-----------------------|
|                                                |                           |                                       |                |      |           |                       |
|                                                |                           | H <sub>2</sub>                        | D <sub>2</sub> |      |           |                       |
| $\gamma$ -AlOOH@1.12%-Al(OH)(1,4-NDC)@n-ZIF-67 | 0                         | 3.40                                  | 4.67           | 7.26 | 1.48 1.68 | 10.36                 |
|                                                | 1                         | 3.78                                  | 6.38           |      | 1.99      | 8.54                  |
|                                                | 2                         | 3.27                                  | 5.42           |      | 2.02      | 7.72                  |
|                                                | 3                         | 4.26                                  | 6.78           |      | 2.04      | 9.43                  |
|                                                | 4                         | 4.63                                  | 7.71           |      | 2.07      | 10.43                 |

**Table S3** Parameters of  $\gamma$ -AlOOH@1.12%-Al(OH)(1,4-NDC)@2-ZIF-67 to separate H<sub>2</sub> and D<sub>2</sub> for different carrier gas flow rate at 77 K with H<sub>2</sub>/D<sub>2</sub> mixture injection volume 50  $\mu$ L (V<sub>H<sub>2</sub></sub>:V<sub>D<sub>2</sub></sub> = 1:1).

| Material                                       | Carrier flow rate (mL/min) | Retention time (t <sub>R</sub> , min) |                | R    | Separation time (min) |
|------------------------------------------------|----------------------------|---------------------------------------|----------------|------|-----------------------|
|                                                |                            |                                       |                |      |                       |
|                                                |                            | H <sub>2</sub>                        | D <sub>2</sub> |      |                       |
| $\gamma$ -AlOOH@1.12%-Al(OH)(1,4-NDC)@2-ZIF-67 | 20                         | 4.52                                  | 8.10           | 2.05 | 10.90                 |
|                                                | 30                         | 3.27                                  | 5.42           | 2.02 | 7.72                  |
|                                                | 60                         | 1.78                                  | 2.97           | 1.99 | 4.38                  |
|                                                | 90                         | 1.30                                  | 2.15           | 1.83 | 2.98                  |
|                                                | 120                        | 0.95                                  | 1.53           | 1.63 | 2.10                  |

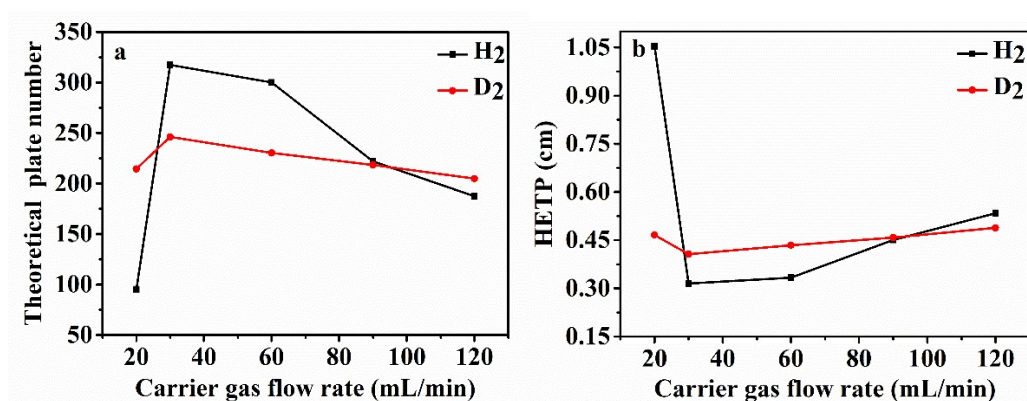

**Fig. S17** The relationship between carrier gas flow rate and the theoretical plate number (a) and the height equivalent of theoretical plates (b) by  $\gamma$ -AlOOH@1.12%-Al(OH)(1,4-NDC)@2-ZIF-67. Chromatographic separation conditions: Column temperature, 77 K; H<sub>2</sub>/D<sub>2</sub> mixture injection volume, 50  $\mu$ L (V<sub>H<sub>2</sub></sub>:V<sub>D<sub>2</sub></sub> = 1:1); Carrier gas He flow rate, 120,90, 60, 30, 20 mL·min<sup>-1</sup>.

**Table S4** Parameters of H<sub>2</sub>/D<sub>2</sub> mixture (V<sub>H<sub>2</sub></sub>:V<sub>D<sub>2</sub></sub> = 1:1) separation at 77 K by  $\gamma$ -AlOOH@1.12%-Al(OH)(1,4-NDC)@2-ZIF-67 with carrier gas He flow rate 30 mL·min<sup>-1</sup>

| Sampling volume (μL) | Peak Height (mV) |                | Peak area (mV·min) |                | R    | Separation time (min) |
|----------------------|------------------|----------------|--------------------|----------------|------|-----------------------|
|                      | H <sub>2</sub>   | D <sub>2</sub> | H <sub>2</sub>     | D <sub>2</sub> |      |                       |
| 50                   | 112.41           | 282.91         | 2827.55            | 15145.00       | 2.02 | 7.72                  |
| 100                  | 207.65           | 541.19         | 6040.40            | 30671.70       | 1.72 | 8.12                  |
| 150                  | 272.95           | 724.44         | 7953.40            | 44657.20       | 1.65 | 8.21                  |
| 200                  | 365.31           | 957.57         | 10330.30           | 57458.31       | 1.58 | 8.02                  |
| 250                  | 442.68           | 1180.41        | 12963.65           | 70540.31       | 1.56 | 7.74                  |

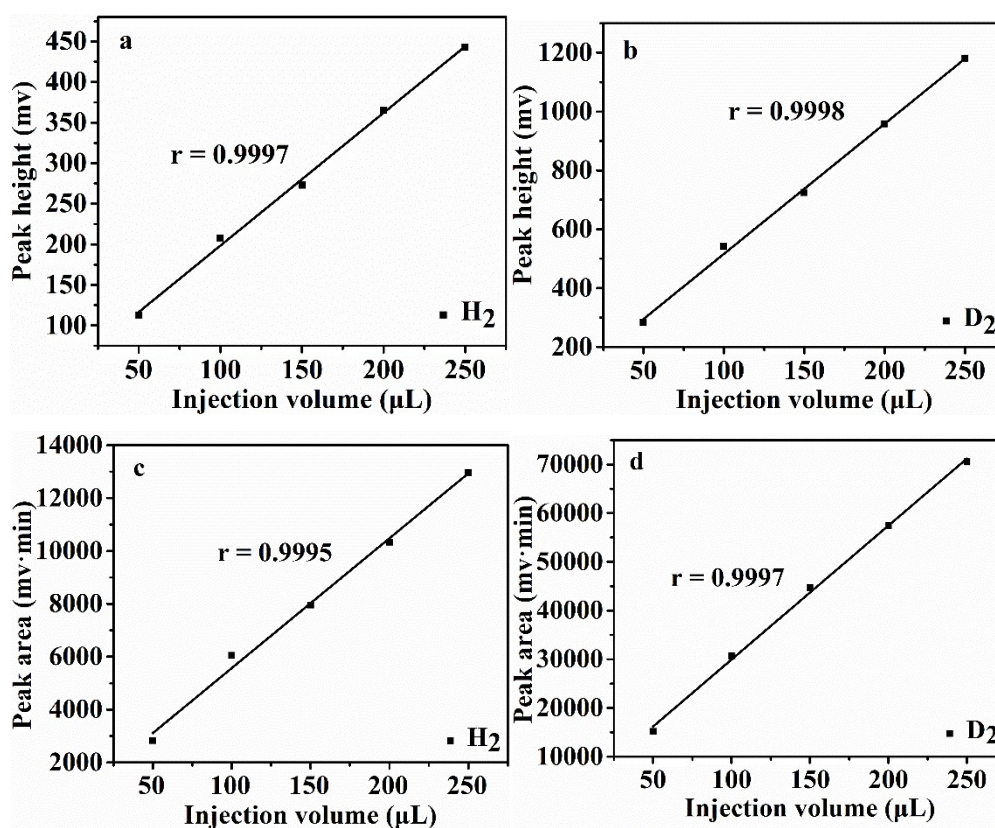

**Fig. S18** The relationship between the injection volume of H<sub>2</sub> and D<sub>2</sub> in the H<sub>2</sub>/D<sub>2</sub> mixture (V<sub>H<sub>2</sub></sub>:V<sub>D<sub>2</sub></sub> = 1:1) with peak height of H<sub>2</sub> (a) and D<sub>2</sub> (b), and the peak area of H<sub>2</sub> (c) and D<sub>2</sub> (d).

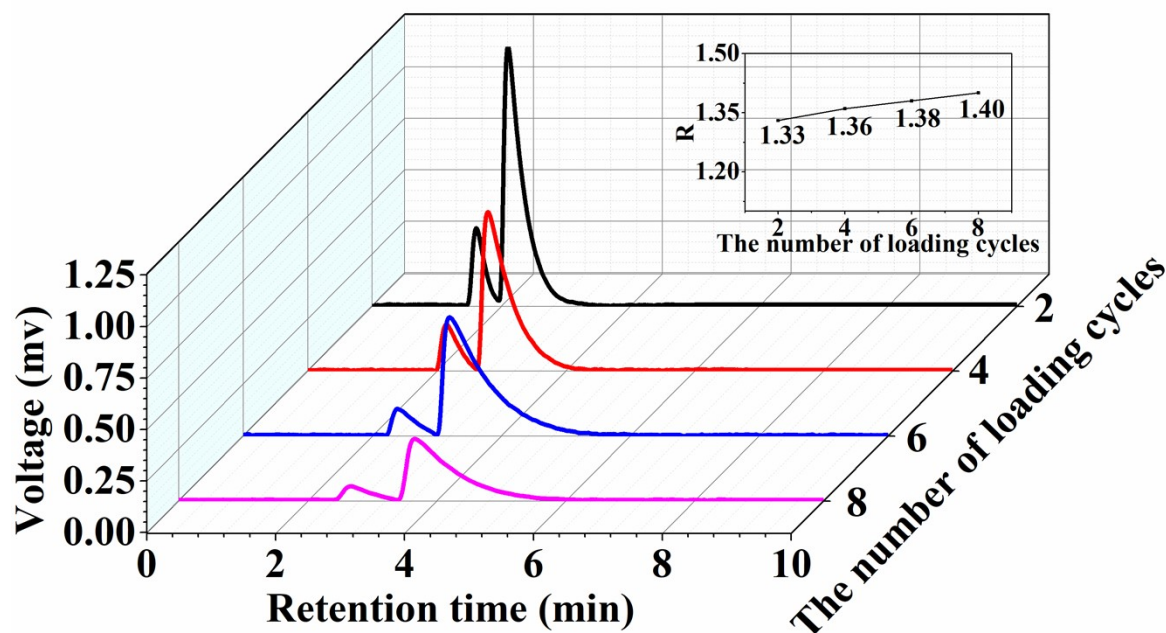

**Fig. S19** Chromatograms of H<sub>2</sub>/D<sub>2</sub> with  $\gamma$ -AlOOH@n'-ZIF-67 (n' = 2, 4, 6, 8) as chromatographic stationary phase. Chromatographic separation conditions: Column temperature, 77 K; H<sub>2</sub>/D<sub>2</sub> mixed gas injection volume, 50  $\mu$ L; Carrier gas He flow rate, 20 mL $\cdot$ min<sup>-1</sup>.

**Table S5** Parameters of  $\gamma$ -AlOOH@n-ZIF-67, H<sub>2</sub> and D<sub>2</sub> for different ZIF-67 loading cycles with H<sub>2</sub>/D<sub>2</sub> mixture injection volume 50  $\mu$ L ( $V_{H_2}:V_{D_2} = 1:1$ )

|           | ZIF-67 load number (n) | Retention time (min) |                | R    | Separation time (min) |
|-----------|------------------------|----------------------|----------------|------|-----------------------|
|           |                        | H <sub>2</sub>       | D <sub>2</sub> |      |                       |
| Materials | 2                      | 1.68                 | 2.25           | 1.33 | 3.64                  |
|           | 4                      | 2.31                 | 3.04           | 1.35 | 4.60                  |
|           | 6                      | 2.65                 | 3.61           | 1.38 | 5.54                  |
|           | 8                      | 2.92                 | 4.10           | 1.42 | 6.60                  |

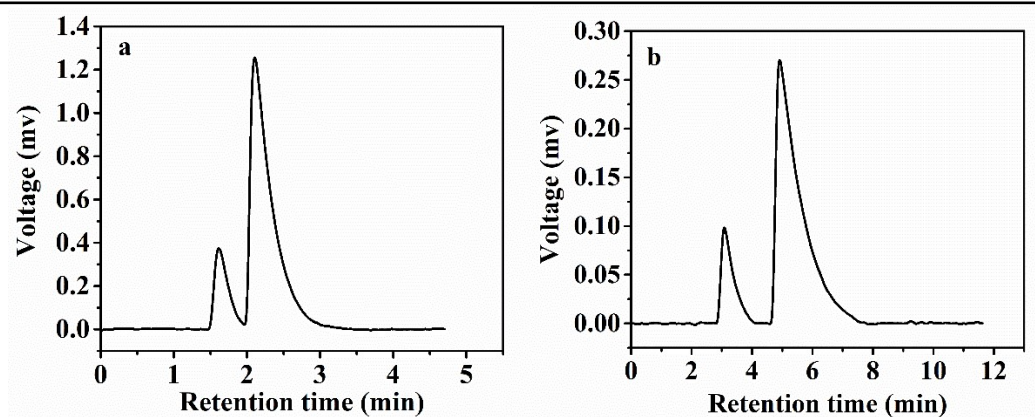

**Fig. S20** Chromatograms of H<sub>2</sub>/D<sub>2</sub> separation with  $\gamma$ -AlOOH@1.12%-Al(OH)(1,4-NDC)@2-ZIF-67 (a) and  $\gamma$ -AlOOH@2-ZIF-67 (b) as chromatographic stationary phases. Chromatographic separation conditions: Column temperature, 77 K; Injection volume, 50  $\mu$ L; Carrier gas He flow rate a: 30 mL·min<sup>-1</sup>, b: 20 mL·min<sup>-1</sup>.

**Table S6** Reproducibility of retention time, peak height and peak area of pure H<sub>2</sub> and pure D<sub>2</sub>, and the corresponding relative standard deviation (RSD) percentage with  $\gamma$ -AlOOH@1.12%-Al(OH)(1,4-NDC)@2-ZIF-67 as chromatographic stationary phase.

| Test times | H <sub>2</sub>       |                  |                    | D <sub>2</sub>       |                  |                    |
|------------|----------------------|------------------|--------------------|----------------------|------------------|--------------------|
|            | Retention time (min) | Peak Height (mV) | Peak area (mV·min) | Retention time (min) | Peak height (mV) | Peak area (mV·min) |
| 1          | 3.097                | 173.217          | 6231.100           | 4.883                | 516.908          | 38376.852          |
| 2          | 3.048                | 174.121          | 6257.500           | 4.833                | 490.255          | 35665.500          |
| 3          | 3.020                | 169.060          | 6081.950           | 4.898                | 491.063          | 33461.699          |
| 4          | 3.025                | 156.372          | 5913.700           | 4.865                | 494.811          | 34644.148          |
| 5          | 3.032                | 179.000          | 6005.800           | 4.797                | 495.389          | 34828.949          |
| 6          | 3.050                | 173.994          | 6372.600           | 4.757                | 503.047          | 35697.652          |
| 7          | 3.027                | 177.159          | 5931.700           | 4.862                | 516.835          | 34463.500          |
| 8          | 2.992                | 183.184          | 6304.700           | 4.840                | 524.825          | 36018.000          |
| 9          | 3.012                | 180.320          | 5993.800           | 4.772                | 518.782          | 32798.098          |
| 10         | 3.048                | 178.456          | 5824.100           | 4.830                | 533.649          | 36452.848          |
| Average    | 3.035                | 174.488          | 6091.695           | 4.834                | 508.556          | 35240.725          |
| SD         | 0.028                | 7.546            | 187.720            | 0.046                | 15.531           | 1583.204           |
| RSD (%)    | 0.923                | 4.325            | 3.082              | 0.952                | 3.054            | 4.493              |

**Table S7** Reproducibility of H<sub>2</sub>/D<sub>2</sub> mixture (25  $\mu$ L:25  $\mu$ L) isotope separation and the corresponding standard deviation (SD), relative standard deviation percentage (%RSD), relative deviation percentage (%) under optimal conditions with  $\gamma$ -AlOOH@1.12%-Al(OH)(1,4-NDC)@2-ZIF-67 as chromatographic stationary phase.

| Test times | Retention time (min) |       | Peak Area ( $SD_{H_2}$ and $SD_{D_2}$ ) of components in mixed samples ( $mV \cdot min$ ) |           | Content determined (%) |        | Relative deviation (%) |       |
|------------|----------------------|-------|-------------------------------------------------------------------------------------------|-----------|------------------------|--------|------------------------|-------|
|            | $H_2$                | $D_2$ | $H_2$                                                                                     | $D_2$     | $H_2$                  | $D_2$  | $H_2$                  | $D_2$ |
| 1          | 3.228                | 5.140 | 2901.500                                                                                  | 17145.600 | 47.630                 | 48.650 | -4.74                  | -2.70 |
| 2          | 3.220                | 5.138 | 3027.200                                                                                  | 16669.051 | 49.690                 | 47.300 | -0.62                  | -5.40 |
| 3          | 3.217                | 5.095 | 2835.150                                                                                  | 16283.601 | 46.540                 | 46.210 | -6.92                  | -7.58 |
| 4          | 3.182                | 5.000 | 3035.400                                                                                  | 16258.601 | 49.830                 | 46.140 | -0.34                  | -7.72 |
| 5          | 3.155                | 4.962 | 2862.200                                                                                  | 16327.100 | 46.990                 | 46.330 | -6.02                  | -7.34 |
| 6          | 3.147                | 4.882 | 2919.000                                                                                  | 16687.100 | 47.920                 | 47.350 | -4.16                  | -5.30 |
| 7          | 3.100                | 4.888 | 3028.550                                                                                  | 16846.500 | 49.720                 | 47.800 | -0.56                  | -4.40 |
| 8          | 3.072                | 4.828 | 2748.600                                                                                  | 16990.500 | 45.120                 | 48.210 | -9.76                  | -3.58 |
| 9          | 3.047                | 4.750 | 2826.800                                                                                  | 16286.700 | 46.400                 | 46.220 | -7.20                  | -7.56 |
| 10         | 3.017                | 5.032 | 2842.000                                                                                  | 17042.100 | 46.650                 | 48.360 | -6.70                  | -3.28 |
| Ave.       | 3.139                | 4.972 | 2902.640                                                                                  | 16653.685 | 47.649                 | 47.257 | -4.70                  | -5.49 |
| SD         | 0.076                | 0.134 | 99.225                                                                                    | 346.284   | 1.630                  | 0.980  | /                      | /     |
| RSD(%)     | 2.421                | 2.695 | 3.418                                                                                     | 2.079     | 3.421                  | 2.074  | /                      | /     |
